# Supplementary material
Source: Springer Nature journal article supplement (https://www.springermedizin.de/resource/supplementary/12943_2010_672_MOESM6_ESM.pdf/9554544)

A

■ Control

■ NGF

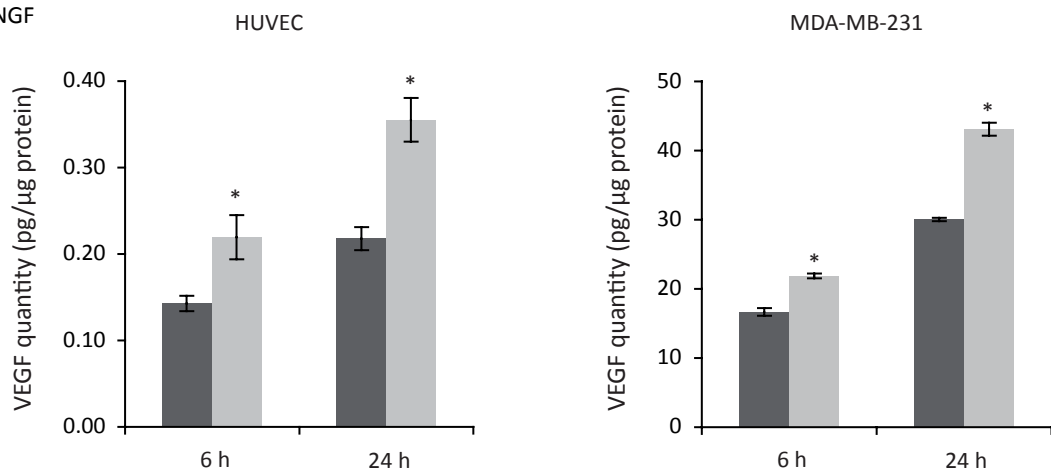

B

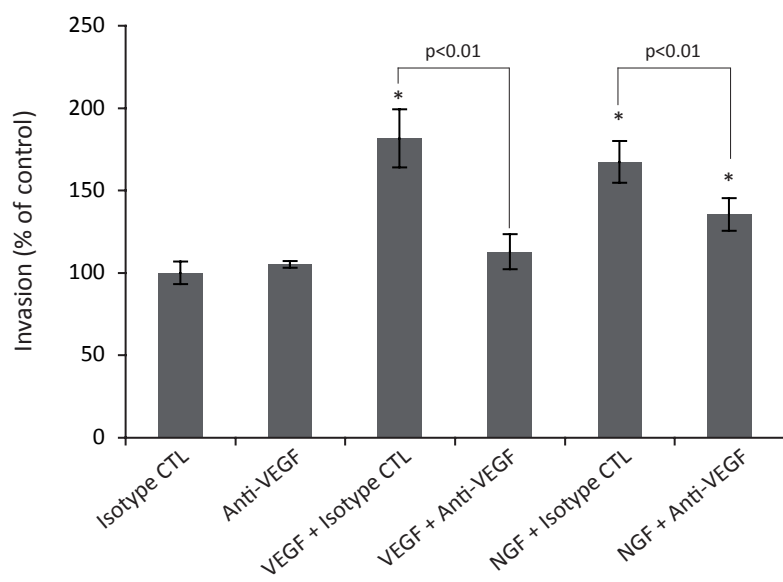

C

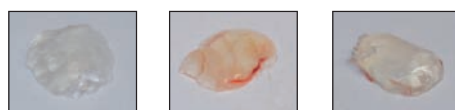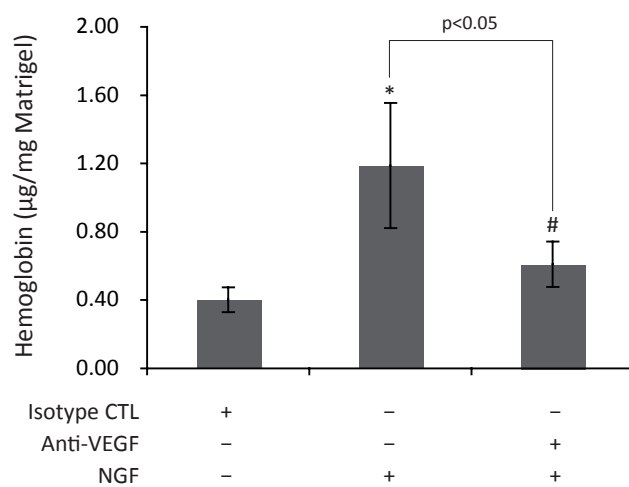

|             |   |   |   |
|-------------|---|---|---|
| Isotype CTL | + | - | - |
| Anti-VEGF   | - | - | + |
| NGF         | - | + | + |

Supplement: MOESM6 [file 9554544]
